# Supplementary material
Source: publisher figshare collection journal article supplement (https://acs.figshare.com/ndownloader/files/4691800)
Supplement: Supplementary file 1 [file 4691800]

# A Concise Total Synthesis of Melithiazole C

Julian Gebauer, Stellios Arseniyadis, Janine Cossy\*

*Laboratoire de Chimie Organique, ESPCI, CNRS, 10 rue Vauquelin*

*75231 Paris Cedex 05 – France*

**General:** All reactions were performed under an argon atmosphere in anhydrous solvents ( $\text{CH}_2\text{Cl}_2$  was distilled from  $\text{CaH}_2$ , THF and  $\text{Et}_2\text{O}$  were distilled from sodium/benzophenone). TLC was performed on Merck 60F<sub>254</sub> silica gel plates and visualized with a UV lamp (254 nm) and a  $\text{KMnO}_4/\text{K}_2\text{CO}_3/\text{AcOH}$  solution in  $\text{H}_2\text{O}$  followed by heating. Flash chromatography was performed with Merck Geduran Si60 silica gel (40-63  $\mu\text{M}$ ). Optical rotations were determined with a Perkin Elmer 343 polarimeter. Infrared (IR) spectra were recorded on a Bruker TENSOR<sup>TM</sup> 27 (IRFT) and wave-numbers are indicated in  $\text{cm}^{-1}$ .  $^1\text{H}$  NMR spectra were recorded on a Bruker AVANCE 400 at 400 MHz and data are reported as follows: chemical shift in ppm relative to the residual solvent peak, multiplicity (s = singlet, d = doublet, t = triplet, q = quartet, quint = quintet, m = multiplet or overlap of non equivalent resonances), integral.  $^{13}\text{C}$  NMR spectra were recorded on a Bruker AVANCE 400 at 100 MHz and data are reported as follows: chemical shift in ppm relative to the residual solvent peak, multiplicity with respect to proton (deduced from DEPT experiments, s =  $\text{C}_q$ , d = CH, t =  $\text{CH}_2$ , q =  $\text{CH}_3$ ). Mass spectra with electronic impact (MS) were recorded with a Hewlett-Packard tandem 5890A/5971 GC-MS (70 eV). High resolution mass spectra (HRMS) were performed by the Groupe de Spectrométrie de Masse de l'Université Pierre et Marie Curie (Paris).

**(R)-4-Benzyl-3-[(2R,3S)-3-hydroxy-2-methyl-pent-4-enoyl]-oxazolidin-2-one (6)<sup>1</sup>**

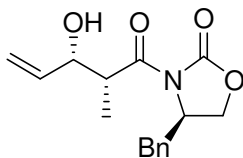

To a solution of oxazolidinone **4** (4.67 g, 20 mmol) in  $\text{CH}_2\text{Cl}_2$  (60 mL) were added *n*-Bu<sub>2</sub>BOTf (24 mL, 1.0 M in  $\text{CH}_2\text{Cl}_2$ , 24 mmol) and  $i\text{Pr}_2\text{NEt}$  (4.8 mL, 27.6 mmol) dropwise at 0 °C. After

<sup>1</sup> Nicolaou, K. C.; Brenzovich, W. E.; Bulger, P. G.; Francis, T. M. *Org. Biomol. Chem.* **2006**, *4*, 2119-2157.

10 min the mixture was cooled to -78 °C and freshly distilled acrolein (7.0 mL, 105 mmol) was added dropwise over 5 min. The mixture was stirred at -78 °C for 45 min and allowed to warm to 0 °C over 30 min before a pH 7 aqueous buffer solution (30 mL) and MeOH (100 mL) were added. A MeOH/35% H<sub>2</sub>O<sub>2</sub> mixture (2/1, 100 mL) was then added slowly over 20 min and the mixture was stirred for a further 20 min at 0 °C before it was concentrated *in vacuo*. The residue was partitioned between Et<sub>2</sub>O (200 mL) and H<sub>2</sub>O (200 mL) and the aqueous phase was extracted with Et<sub>2</sub>O (2 x 200 mL). The combined organic phases were washed with a saturated aqueous NaHCO<sub>3</sub> solution (150 mL) and brine (150 mL). Drying over MgSO<sub>4</sub>, evaporation of the solvent and purification of the residue by flash chromatography (SiO<sub>2</sub>; 30% EtOAc in hexane) gave **6** (5.39 g, 93%) as a white solid.

**(R)-4-Benzyl-3-[(2R,3S)-3-methoxy-2-methyl-pent-4-enoyl]-oxazolidin-2-one (7)**

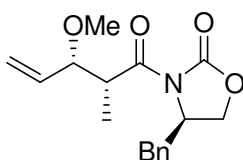

To a solution of alcohol **6** (1.8 g, 6.2 mmol) and 2,6-ditertbutyl pyridine (11.5 g, 60 mmol) in CH<sub>2</sub>Cl<sub>2</sub> (30 mL) was added methyl triflate (8.2 g, 50 mmol) dropwise and the mixture was stirred for 40 h at rt. The reaction was quenched with a saturated aqueous NaHCO<sub>3</sub> solution (100 mL), extracted with CH<sub>2</sub>Cl<sub>2</sub> (2 x 100 mL) and the combined organic phases were dried over MgSO<sub>4</sub>. Evaporation of the solvent and purification of the residue by flash chromatography (SiO<sub>2</sub>; hexane to ether/hexane : 1/1) gave **7** (1.6 g, 85%) as a colourless viscous oil.

**R<sub>f</sub>** = 0.28 (ether/hexane : 1/1); [**α**]<sub>D</sub><sup>20</sup> – 69.0 (*c* 1.0, CHCl<sub>3</sub>); **IR**: 2981, 2922, 1773, 1694, 1454, 1379, 1192, 1092, 980, 928, 745, 700 cm<sup>-1</sup>; **<sup>1</sup>H NMR** (CDCl<sub>3</sub>, 400 MHz): δ = 7.40-7.29 (m, 3H), 7.28-7.19 (m, 2H), 5.82 (m, 1H), 5.31-5.27 (m, 2H), 4.66 (m, 1H), 4.19 (quint, *J* = 7 Hz, 2H), 4.11 (m, 1H), 3.77 (t<sub>app</sub>, *J* = 7.0 Hz, 1H), 3.31 (s, 3H), 3.30 (m, 1H), 2.78 (dd, *J* = 9.8 and 13.3 Hz, 1H), 1.29 (d, *J* = 7.0 Hz, 3H); **<sup>13</sup>C NMR** (CDCl<sub>3</sub>, 100 MHz): δ = 174.6 (s), 153.2 (s), 136.0 (d), 135.3 (s), 129.5 (2 x d), 128.9 (2 x d), 127.3 (d), 119.0 (t), 84.1 (d), 66.0 (t), 56.8 (q), 55.5 (d), 42.3 (d), 37.8 (t), 13.3 (q); **MS** (EI, 70 eV): *m/z* (%): 303 (2), 272 (10), 256 (2), 156 (3), 127 (28), 117 (12), 99 (8), 91 (18), 71 (100); **HRMS** (ESI): calcd for C<sub>17</sub>H<sub>21</sub>NNaO<sub>4</sub> [M + Na]<sup>+</sup>: 326.1363, found: 326.1357.

**(4*R*,5*S*)-5-Methoxy-4-methyl-3-oxo-hept-6-enoic acid methyl ester (8)**

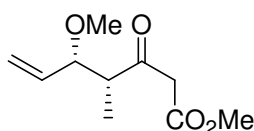

To a solution of oxazolidinone **7** (607 mg, 2 mmol) in THF/H<sub>2</sub>O (4/1, 5 mL) at 0 °C was added a 35% aqueous H<sub>2</sub>O<sub>2</sub> solution (0.8 mL, 8 mmol) dropwise followed by LiOH·H<sub>2</sub>O (168 mg, 4 mmol). After 1 h the mixture was treated with a saturated aqueous Na<sub>2</sub>S<sub>2</sub>O<sub>5</sub> solution (5 mL), diluted with H<sub>2</sub>O (20 mL) and washed with CH<sub>2</sub>Cl<sub>2</sub> (3 x 20 mL). The aqueous phase was then acidified with 3M HCl (8 mL) and extracted with EtOAc (4 x 30 mL). Drying of the combined organic phases over MgSO<sub>4</sub> and evaporation of the solvent gave the crude acid which was dissolved in THF (10 mL) and treated with carbonyl diimidazole (357 mg, 2.2 mmol) at 0 °C. After 2 h at rt the mixture was added dropwise to a solution of LiCH<sub>2</sub>CO<sub>2</sub>Me prepared from AcOMe (444 mg, 6 mmol), <sup>i</sup>Pr<sub>2</sub>NH (610 mg, 6 mmol) and *n*-BuLi (6 mmol, 2M in cyclohexane) at -78 °C and stirring was continued for 2 h at -78 °C. The reaction was quenched with 2N HCl (20 mL) and the aqueous phase was extracted with Et<sub>2</sub>O (3 x 20 mL). Drying of the combined organic phases over MgSO<sub>4</sub>, evaporation of the solvent and purification of the residue by flash chromatography (SiO<sub>2</sub>; ether/hexane : 1/4) gave **8** (300 mg, 75%) as a colourless oil [ratio keto/enol-form = 9/1].

**R<sub>f</sub>** = 0.18 (ether/hexane : 1/4); [**α**]<sub>D</sub><sup>20</sup> – 41.8 (*c* 1.0, CHCl<sub>3</sub>); **IR**: 2983, 2939, 2825, 1747, 1713, 1629, 1437, 1311, 1238, 1160, 1087, 997, 930, 841, 656 cm<sup>-1</sup>; **<sup>1</sup>H NMR** (CDCl<sub>3</sub>, 400 MHz, keto-form): δ = 5.64 (m, 1H), 5.33-5.24 (m, 2H), 3.77 (m, 1H), 3.75 (s, 3H), 3.61 (d, *J* = 15.8 Hz, 2H), 3.57 (d, *J* = 15.8 Hz, 2H), 3.28 (s, 3H), 2.94 (dq, *J* = 5.5 and 7.0 Hz, 1H), 1.12 (d, *J* = 7.0 Hz, 3H); **<sup>13</sup>C NMR** (CDCl<sub>3</sub>, 100 MHz, keto-form): δ = 204.6 (s), 167.8 (s), 134.9 (d), 119.4 (t), 83.8 (d), 56.6 (q), 52.2 (d), 50.8 (q), 49.4 (t), 11.8 (q); **MS** (EI, 70 eV): *m/z* (%): 168 (2), 127 (4), 101 (12), 95 (6), 71 (100), 59 (8); **HRMS** (ESI): calcd for C<sub>10</sub>H<sub>16</sub>NaO<sub>4</sub> [*M* + Na]<sup>+</sup>: 223.0946, found: 223.0941.

**(*E*)-(4*R*,5*S*)-3,5-Dimethoxy-4-methyl-hepta-2,6-dienoic acid methyl ester (2)**

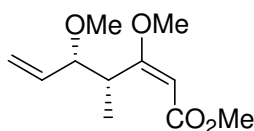

To a solution of keto ester **8** (200 mg, 1.0 mmol) and trimethyl orthoformate (424 mg, 4.0 mmol) in MeOH (5 mL) was added concentrated sulphuric acid (20 mg, 0.2 mmol) and the mixture was stirred for 48 h at rt. After dilution with Et<sub>2</sub>O (80 ml) the organic phase was washed with a saturated aqueous NaHCO<sub>3</sub> solution (10 mL), dried over MgSO<sub>4</sub> and concentrated. Purification of the residue by flash chromatography (SiO<sub>2</sub>; ether/hexane : 1/5) gave **2** (180 mg, 84%) as a colourless oil.

**R<sub>f</sub>** = 0.25 (ether/hexane : 1/5); [ $\alpha$ ]<sub>D</sub><sup>20</sup> + 171.0 (*c* 1.0, CHCl<sub>3</sub>); **IR**: 2940, 2821, 1710, 1621, 1436, 1382, 1270, 1193, 1138, 1093, 1038, 993, 923, 824, 696 cm<sup>-1</sup>; **<sup>1</sup>H NMR** (C<sub>6</sub>D<sub>6</sub>, 400 MHz):  $\delta$  = 5.97 (ddd, *J* = 8.0, 10.3 and 16.9 Hz, 1H), 5.22-5.13 (m, 2H), 5.11 (s, 1H), 4.79 (dq, *J* = 6.8 and 8.5 Hz, 1H), 3.75 (t<sub>app</sub>, *J* = 8.3 Hz, 1H), 3.58 (s, 3H), 3.27 (s, 3H), 3.03 (s, 3H), 1.53 (d, *J* = 6.8 Hz, 3H); **<sup>13</sup>C NMR** (C<sub>6</sub>D<sub>6</sub>, 100 MHz):  $\delta$  = 176.5 (s), 167.3 (s), 137.7 (d), 117.2 (t), 91.4 (d), 85.4 (d), 56.2 (q), 54.5 (q), 50.2 (q), 39.7 (d), 14.5 (q); **MS** (EI, 70 eV): *m/z* (%): 199 (2), 182 (14), 169 (8), 155 (7), 123 (12), 111 (3), 71 (100); **HRMS** (ESI): calcd for C<sub>11</sub>H<sub>18</sub>NaO<sub>4</sub> [M + Na]<sup>+</sup>: 237.1103, found: 237.1097.

### 1-(4-Bromo-thiazol-2-yl)-ethanone (**9**)<sup>2</sup>

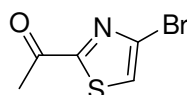

To a solution of dibromthiazole **5** (1.2 g, 5 mmol) in THF (10 mL) was added *n*-BuLi (2.75 mL, 5.5 mmol) dropwise at -78 °C. After 30 min *N*-acetyl morpholine was added dropwise and the mixture was stirred for 2 h at -78 °C before being diluted with Et<sub>2</sub>O (100 ml) and washed with a saturated aqueous NaHCO<sub>3</sub> solution (20 mL). Drying of the organic phase over MgSO<sub>4</sub>, evaporation of the solvent and purification of the residue by flash chromatography (SiO<sub>2</sub>; 10% ether in hexane) gave **9** (835 mg, 81%) as a white solid.

### 1-(4-Vinyl-thiazol-2-yl)-ethanone (**3**)

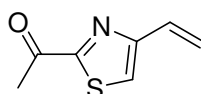

<sup>2</sup> Ung, A. T.; Pyne, S. G. *Tetrahedron: Asymmetry* **1998**, 9, 1395-1407.

To a solution of bromide **9** (410 mg, 2 mmol) and PdCl<sub>2</sub>(PPh<sub>3</sub>)<sub>2</sub> (30 mg, 0.04 mmol) in dioxane (10 mL) was added vinyl tributyltin (700 mg, 2.2 mmol) dropwise and the mixture was stirred for 16 h at 100 °C. After dilution with Et<sub>2</sub>O (100 mL) the organic phase was washed with H<sub>2</sub>O (2 x 20 mL), dried over MgSO<sub>4</sub> and concentrated. Purification of the residue by flash chromatography (SiO<sub>2</sub>; pentane to 5% ether in pentane) gave **3** (280 mg, 91%) as a yellow oil.

**R<sub>f</sub>** = 0.13 (5% ether in pentane); **IR**: 3099, 1685, 1483, 1451, 1357, 1275, 1054, 984, 946, 924, 780, 735 cm<sup>-1</sup>; **<sup>1</sup>H NMR** (CDCl<sub>3</sub>, 400 MHz):  $\delta$  = 7.36 (s, 1H), 6.70 (dd, *J* = 10.8 and 17 Hz, 1H), 6.08 (dd, *J* = 1.5 and 17.0 Hz, 1H), 5.40 (dd, *J* = 1.5 and 10.8 Hz, 1H), 2.67 (s, 3H); **<sup>13</sup>C NMR** (CDCl<sub>3</sub>, 100 MHz):  $\delta$  = 191.9 (s), 166.7 (s), 156.2 (s), 129.4 (d), 121.9 (d), 118.0 (t), 26.0 (q); **MS** (EI, 70 eV): *m/z* (%): 153 (100), 138 (22), 125 (34), 111 (25), 84 (32), 69 (4), 58 (15); **HRMS** (ESI): calcd for C<sub>7</sub>H<sub>7</sub>NNaOS [M + Na]<sup>+</sup>: 176.0141, found: 176.0140.

### Melithiazole C (**1**)<sup>3</sup>

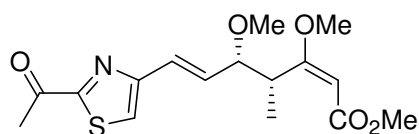

To a solution of **2** (21 mg, 0.1 mmol) and **3** (31 mg, 0.2 mmol) in CH<sub>2</sub>Cl<sub>2</sub> (2 mL) was added Grubbs 2<sup>nd</sup> generation catalyst (25 mg, 0.03 mmol) and the mixture was stirred for 60 h at 40 °C. Evaporation of the solvent, purification of the residue by flash chromatography (SiO<sub>2</sub>; 2% acetone in CH<sub>2</sub>Cl<sub>2</sub>) and recrystallization from ether/hexane gave **1** (19 mg, 56%) as a white solid.

**R<sub>f</sub>** = 0.23 (2% acetone in CH<sub>2</sub>Cl<sub>2</sub>); **Mp**: 97-99 °C [ $\alpha$ ]<sub>D</sub><sup>20</sup> + 167.0 (c 0.3, MeOH); **IR**: 2933, 1709, 1688, 1622, 1438, 1383, 1359, 1272, 1145, 1093, 1054, 972, 928, 826 cm<sup>-1</sup>; **<sup>1</sup>H NMR** (CDCl<sub>3</sub>, 400 MHz):  $\delta$  = 7.31 (s, 1H), 6.52 (d, *J* = 15.8 Hz, 1H), 6.40 (dd, *J* = 7.5 and 15.8 Hz, 1H), 4.90 (s, 1H), 4.11 (dq, *J* = 7.0 and 7.5 Hz, 1H), 3.75 (t<sub>app</sub>, *J* = 7.5, 1H), 3.59 (s, 3H), 3.54 (s, 3H), 3.27 (s, 3H), 2.64 (s, 3H), 1.14 (d, *J* = 7.0 Hz, 3H); **<sup>13</sup>C NMR** (CDCl<sub>3</sub>, 100 MHz):  $\delta$  = 191.9 (s), 176.5 (s), 167.7 (s), 166.5 (s), 155.6 (s), 133.2 (d), 124.7 (d), 121.4 (d), 91.1 (d), 84.2 (d), 57.1 (q), 55.5 (q), 50.8 (q), 39.8 (d), 26.0 (q), 13.9 (q); **MS** (EI, 70 eV): *m/z* (%): 307 (4), 276 (6), 196 (100), 181 (12), 154 (15), 123 (4); **HRMS** (ESI): calcd for C<sub>16</sub>H<sub>21</sub>NNaO<sub>5</sub>S [M + Na]<sup>+</sup>: 362.1033, found: 362.1027.

<sup>3</sup> Söker, U.; Sasse, F.; Kunze, B.; Höfle, G. *Eur. J. Org. Chem.* **2000**, 11, 2021-2026.

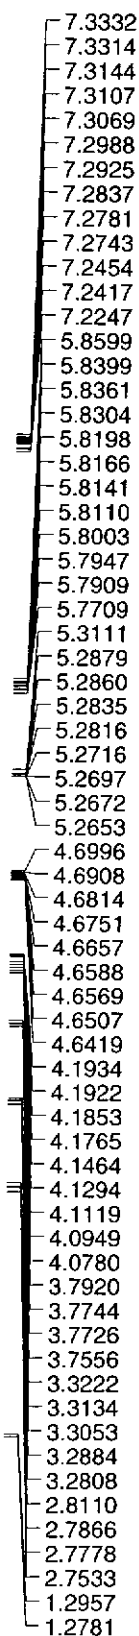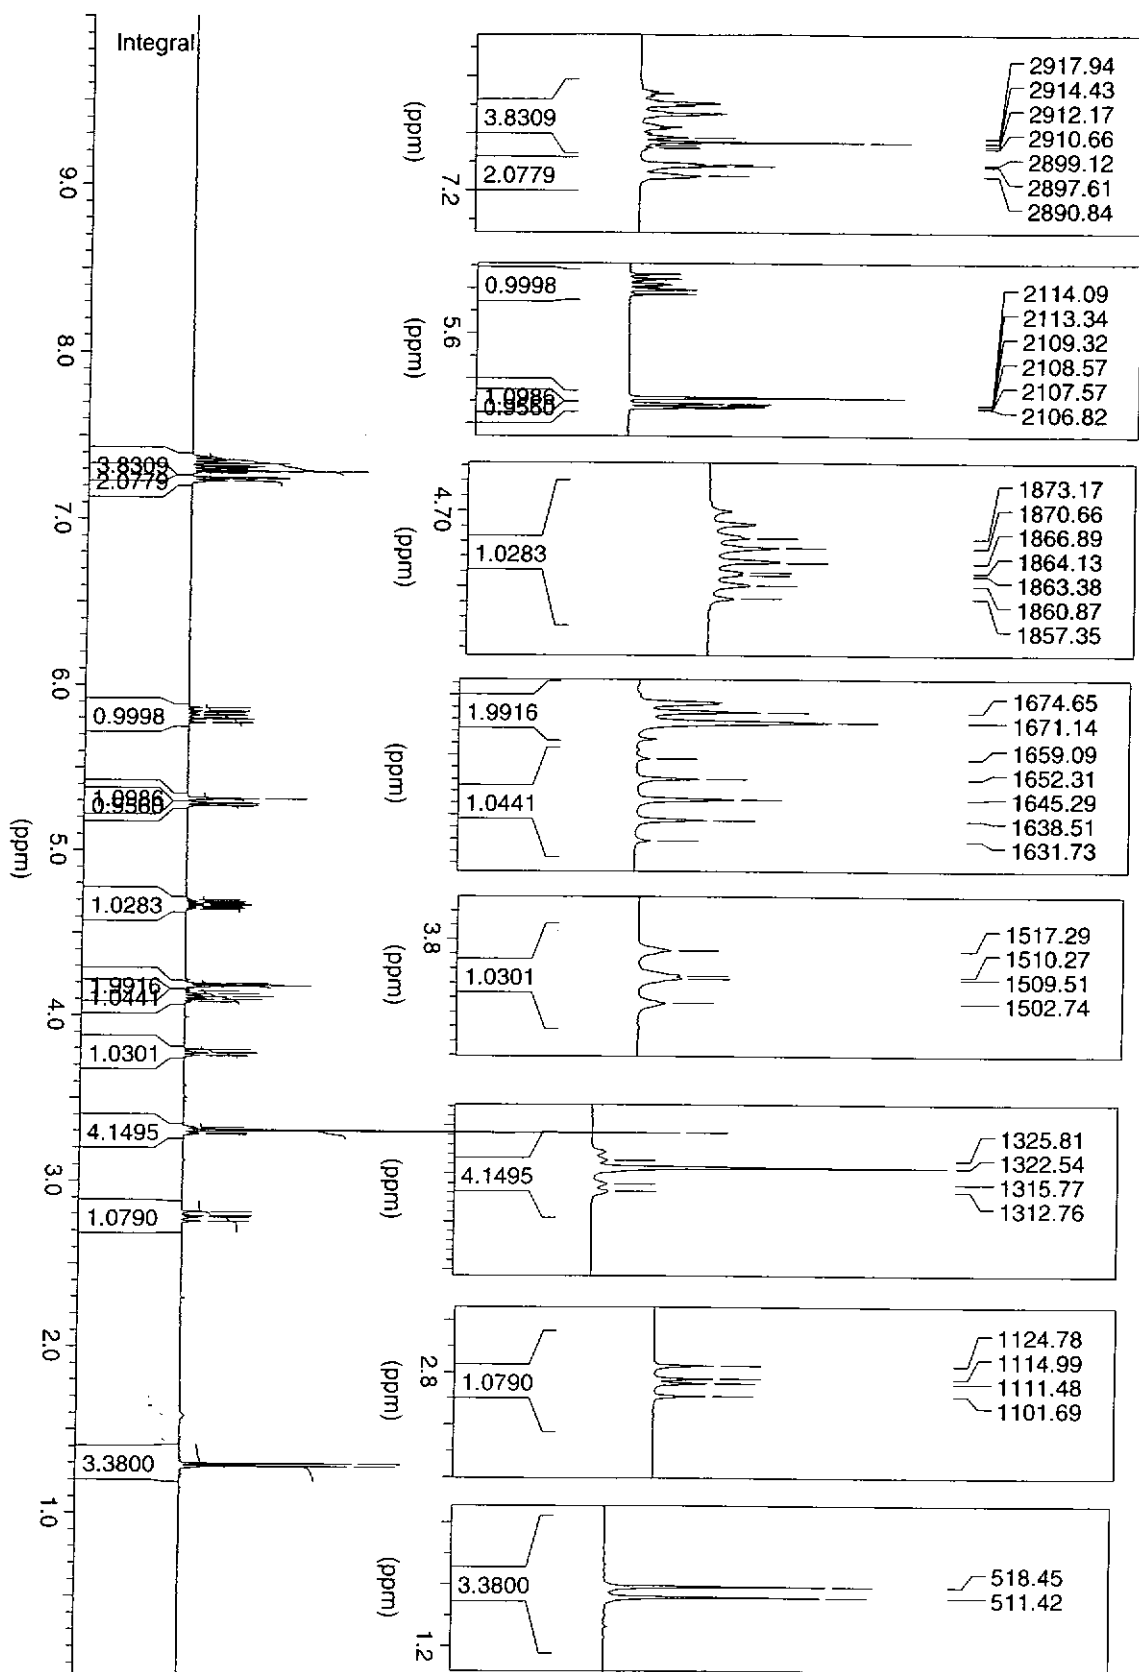

NUCLEUS : off

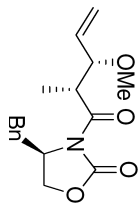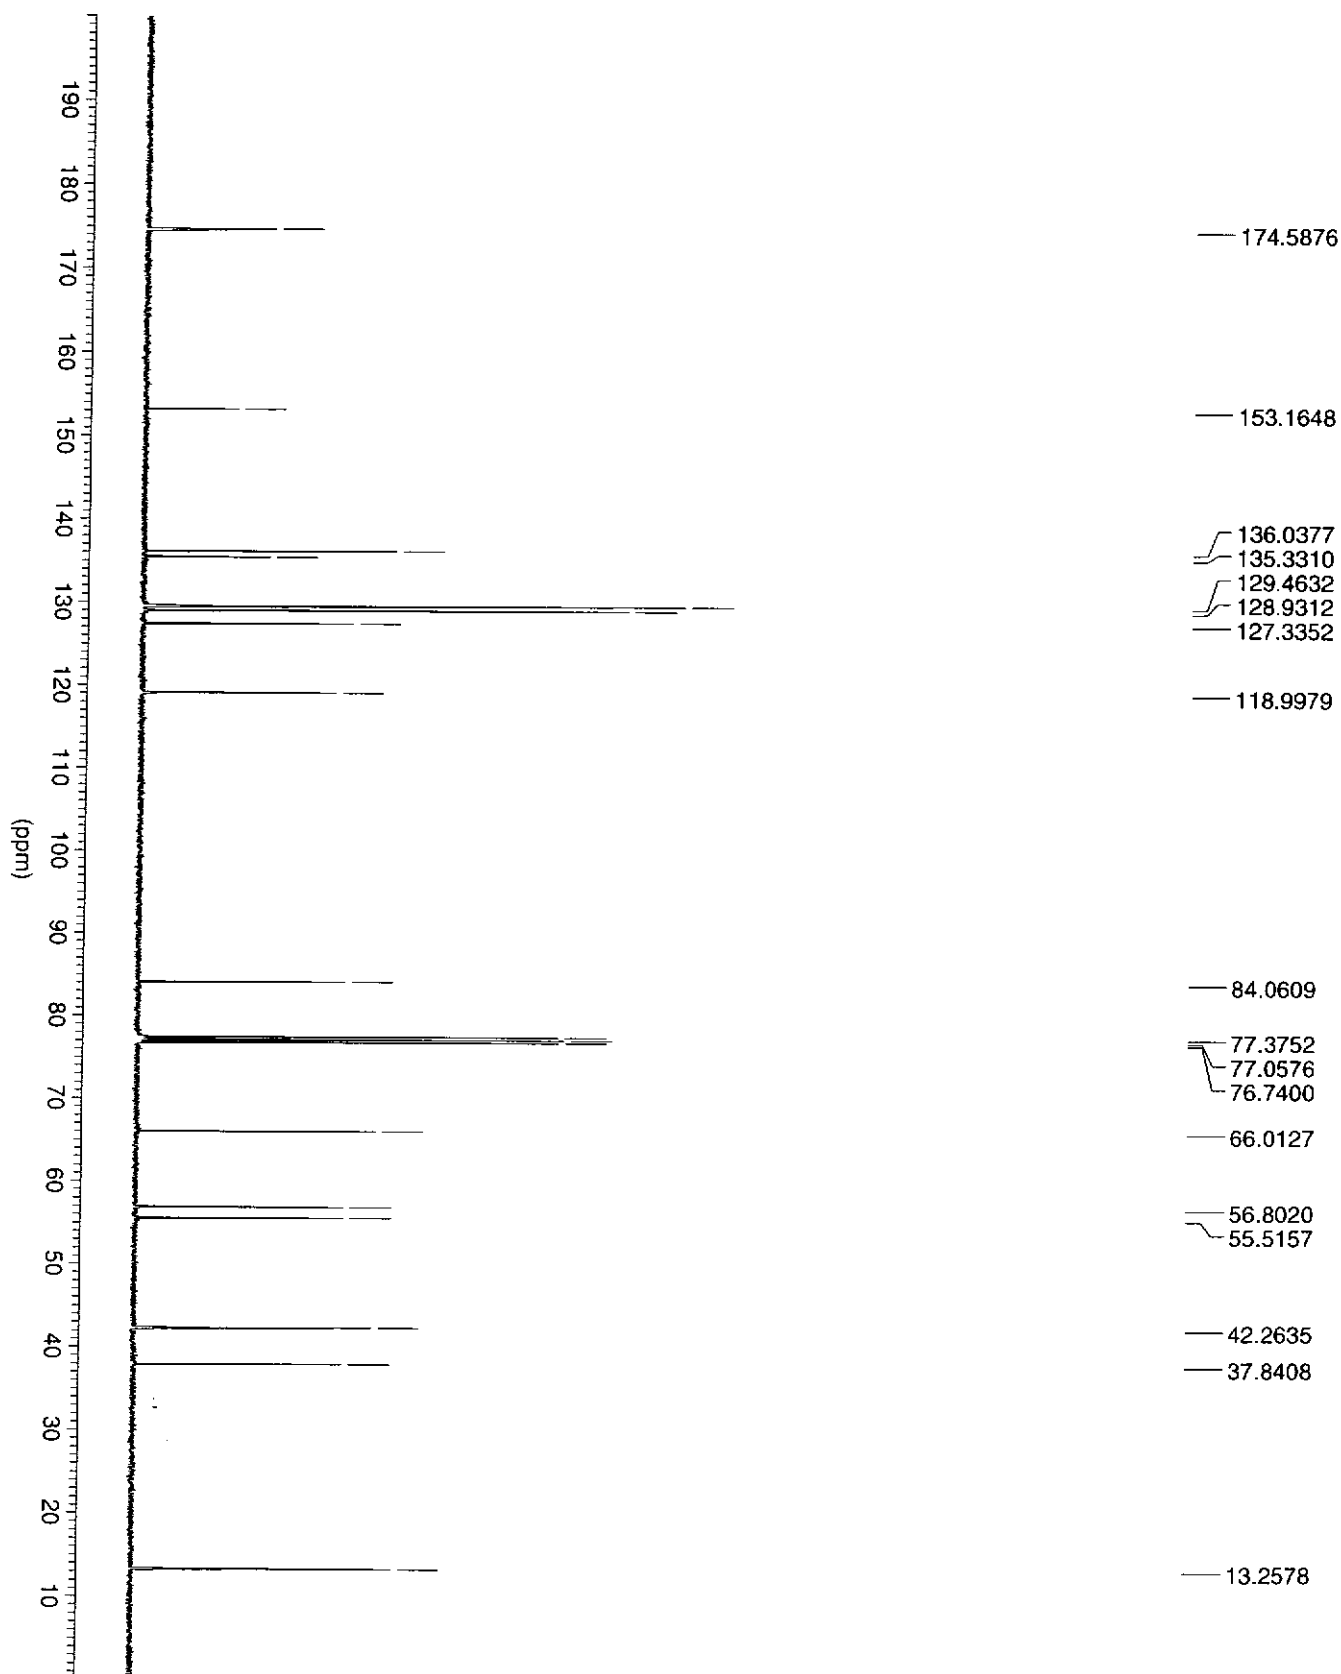

\*\*\* Current Data Parameters \*\*\*  
 NAME : 20070319  
 EXPNO : 550  
 PROCNO : 1  
 \*\*\* Acquisition Parameters \*\*\*  
 AQ\_mod : qsim  
 AUNM : au\_zg  
 BF1 : 100.6127690 MHz  
 BF2 : 400.1300000 MHz  
 DECSAT : DO  
 DS : 4  
 FW : 90000.00 Hz  
 INSTRUM : spect  
 LOCNUC : 2H  
 NS : 512  
 NUCLEUS : off  
 O1 : 10060.17 Hz  
 O2 : 1600.52 Hz  
 PULPROG : zgpg30  
 RO : 20 Hz  
 SFO1 : 100.6228292 MHz  
 SOLVENT : CDCl3  
 SW : 260.1598 ppm  
 SW\_h : 26178.010 Hz  
 TD : 65536  
 TE : 297.0 K  
 VD : 0.0000000 sec  
 YMAX\_a : 1241530112.0000000  
 YMIN\_a : -907072064.0000000  
 \*\*\* Processing Parameters \*\*\*  
 NC\_proc : 1  
 OFFSET : 230.082 ppm  
 SF : 100.6127690 MHz  
 SI : 32768  
 \*\*\* 1D NMR Plot Parameters \*\*\*  
 NC\_proc : 1  
 NUCLEUS : off

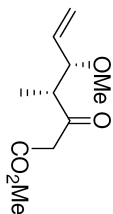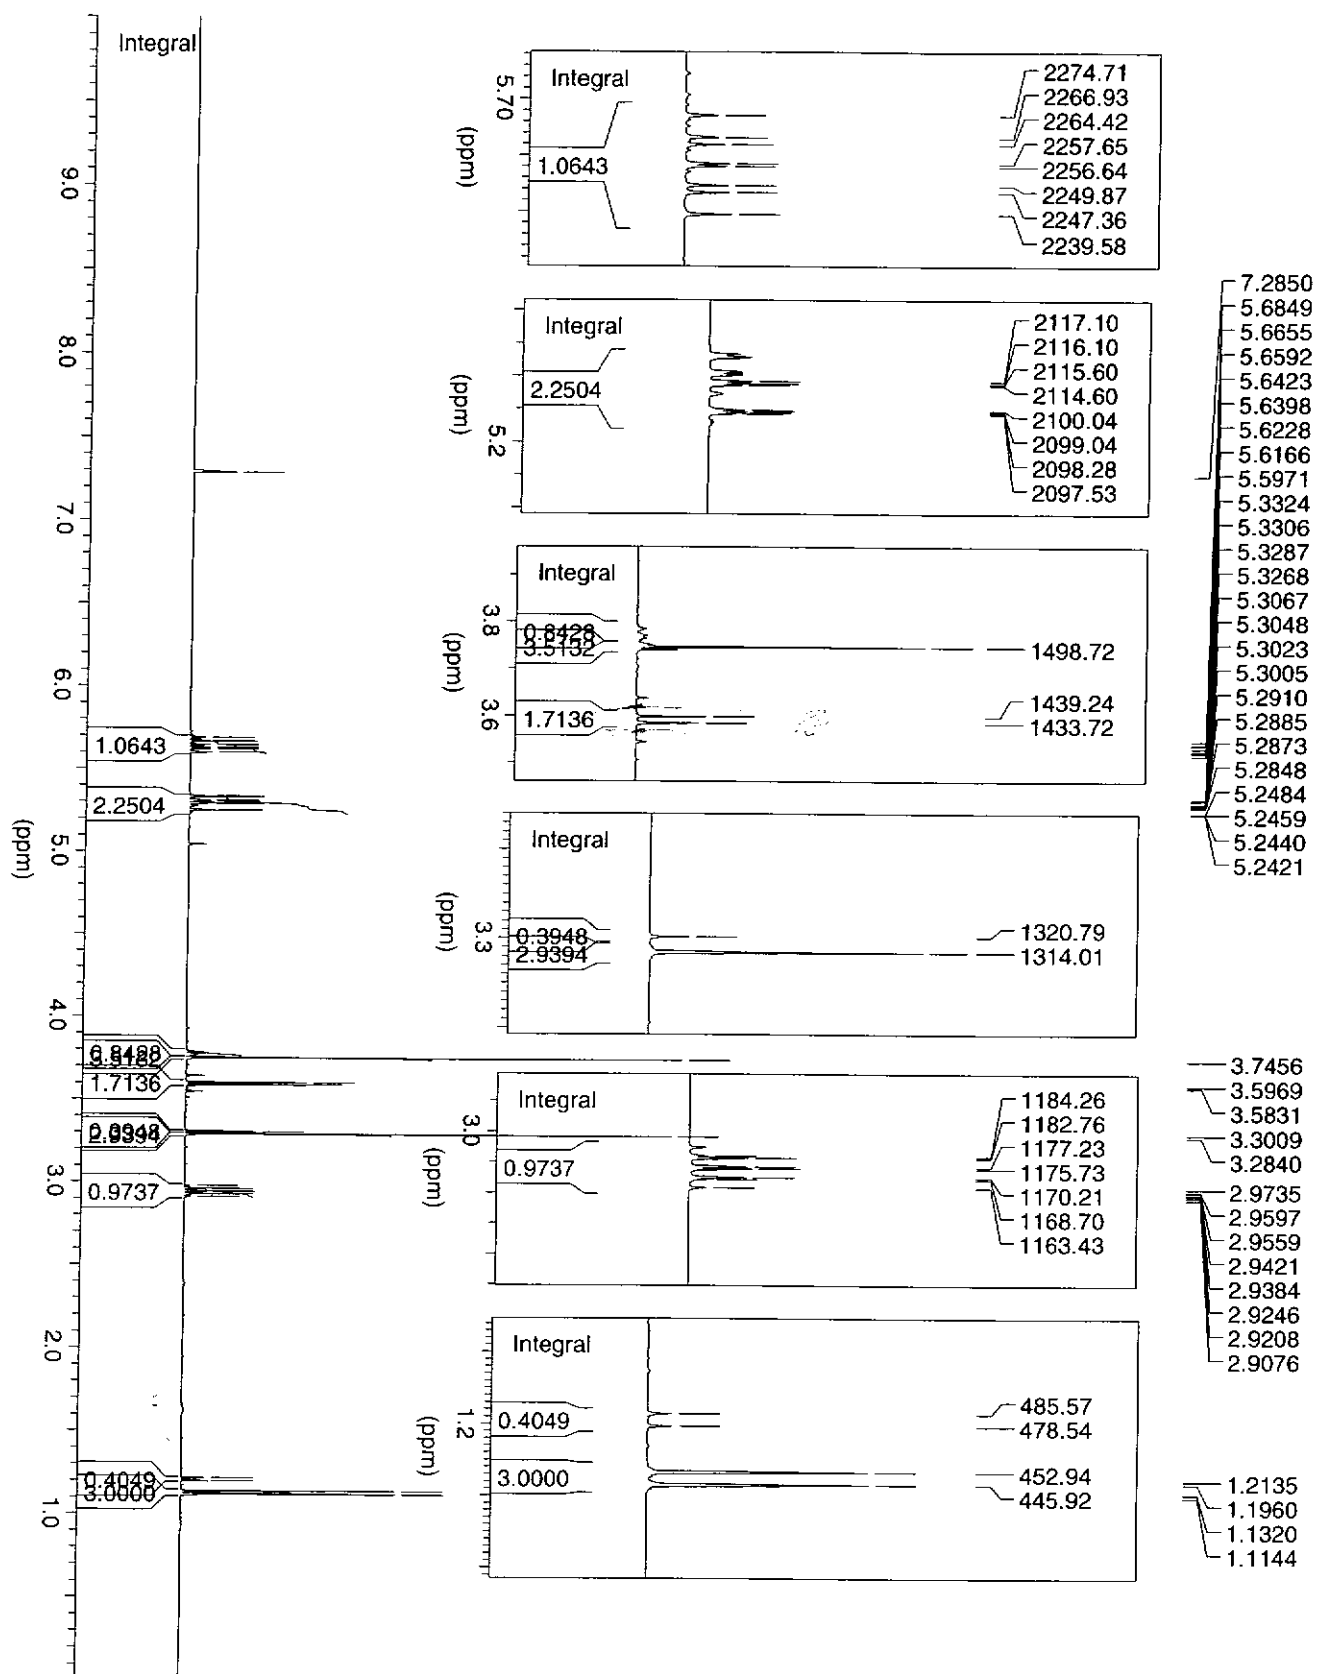

\*\*\* Current Data Parameters \*\*\*

|        |            |
|--------|------------|
| NAME   | : 20070327 |
| EXPNO  | : 70       |
| PROCNO | : 1        |

\*\*\* Acquisition Parameters \*\*\*

|         |                      |
|---------|----------------------|
| AQ_mod  | : dcd                |
| AUNM    | : au_zg              |
| BF1     | : 400.130000 MHz     |
| BF2     | : 400.130000 MHz     |
| DECSAT  | : DO                 |
| DS      | : 2                  |
| FW      | : 90000.00 Hz        |
| INSTRUM | : spect              |
| LOCNUC  | : 2H                 |
| NS      | : 16                 |
| NUCLEUS | : off                |
| O1      | : 2470.97 Hz         |
| O2      | : 2470.97 Hz         |
| PULPROG | : zg30               |
| RO      | : 20 Hz              |
| SFO1    | : 400.1324710 MHz    |
| SOLVENT | : CDCl3              |
| SW      | : 20.5524 ppm        |
| SW_h    | : 8223.684 Hz        |
| TD      | : 65536              |
| TE      | : 296.1 K            |
| VD      | : 0.000000 sec       |
| YMAX_a  | : 1217683328.0000000 |
| YMIN_a  | : -926298200.0000000 |

\*\*\* Processing Parameters \*\*\*

|         |                  |
|---------|------------------|
| NC_proc | : -2             |
| OFFSET  | : 16.452 ppm     |
| SF      | : 400.130000 MHz |
| SI      | : 32768          |

\*\*\* 1D NMR Plot Parameters \*\*\*

|         |       |
|---------|-------|
| NC_proc | : -2  |
| NUCLEUS | : off |



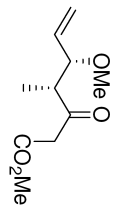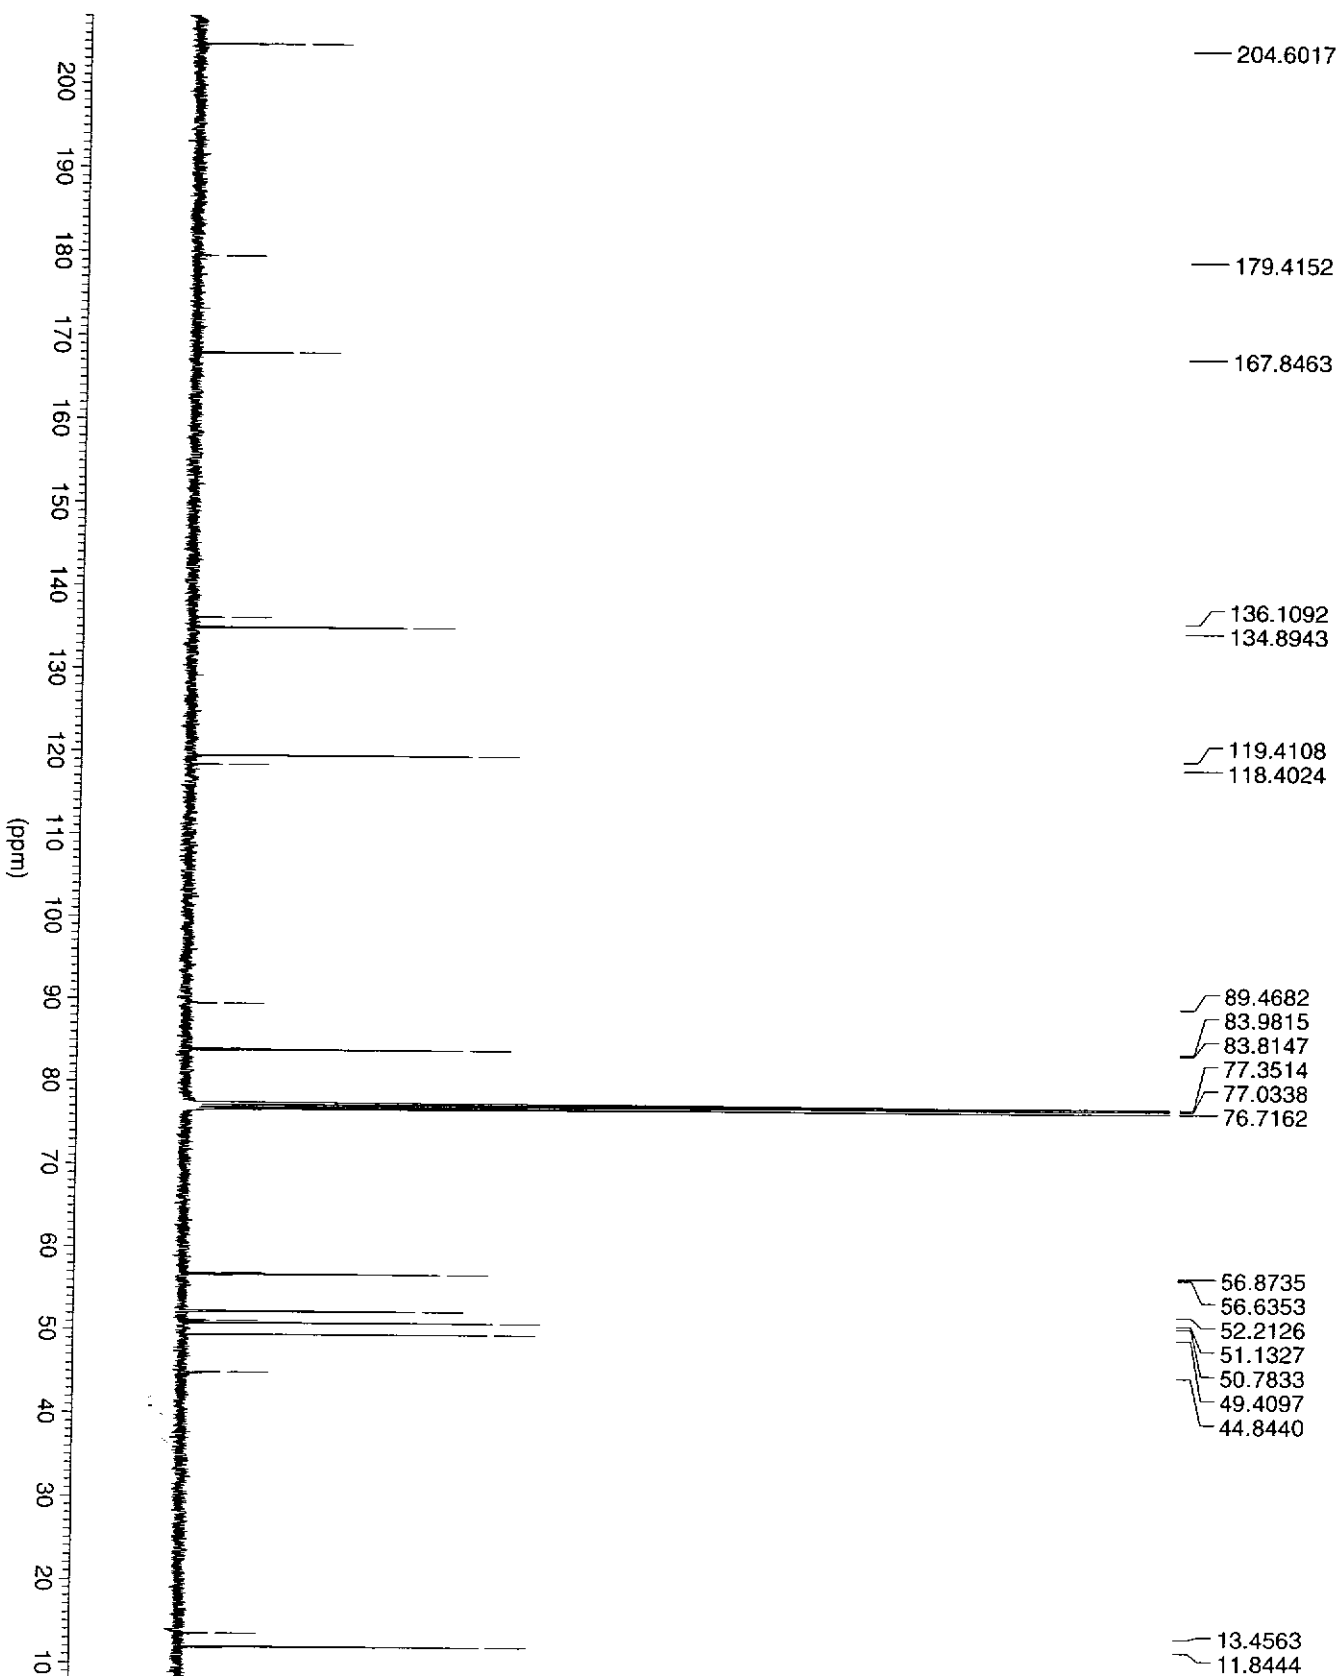

\*\*\* Current Data Parameters \*\*\*

|        |            |
|--------|------------|
| NAME   | : 20070327 |
| EXPNO  | : 170      |
| PROCNO | : 1        |

\*\*\* Acquisition Parameters \*\*\*

|         |                      |
|---------|----------------------|
| AQ_mod  | : qsim               |
| AUNM    | : au_29              |
| BF1     | : 100.6127690 MHz    |
| BF2     | : 400.1300000 MHz    |
| DECSTAT | : DO                 |
| DS      | : 4                  |
| FW      | : 90000.00 Hz        |
| INSTRUM | : spect              |
| LOCNUC  | : 2H                 |
| NS      | : 512                |
| NUCLEUS | : off                |
| O1      | : 10060.17 Hz        |
| O2      | : 1600.52 Hz         |
| PULPROG | : zgpg30             |
| RO      | : 20 Hz              |
| SFO1    | : 100.6228292 MHz    |
| SOLVENT | : CDCl3              |
| SW      | : 260.1598 ppm       |
| SW_h    | : 26178.010 Hz       |
| TD      | : 65536              |
| TE      | : 296.9 K            |
| VD      | : 0.0000000 sec      |
| YMAX_a  | : 1236162304.0000000 |
| YMIN_a  | : -911467776.0000000 |

\*\*\* Processing Parameters \*\*\*

|         |                   |
|---------|-------------------|
| NC_proc | : 1               |
| OFFSET  | : 230.082 ppm     |
| SF      | : 100.6127690 MHz |
| SI      | : 32768           |

\*\*\* 1D NMR Plot Parameters \*\*\*

|         |       |
|---------|-------|
| NC_proc | : 1   |
| NUCLEUS | : off |

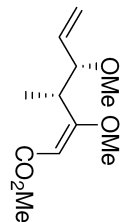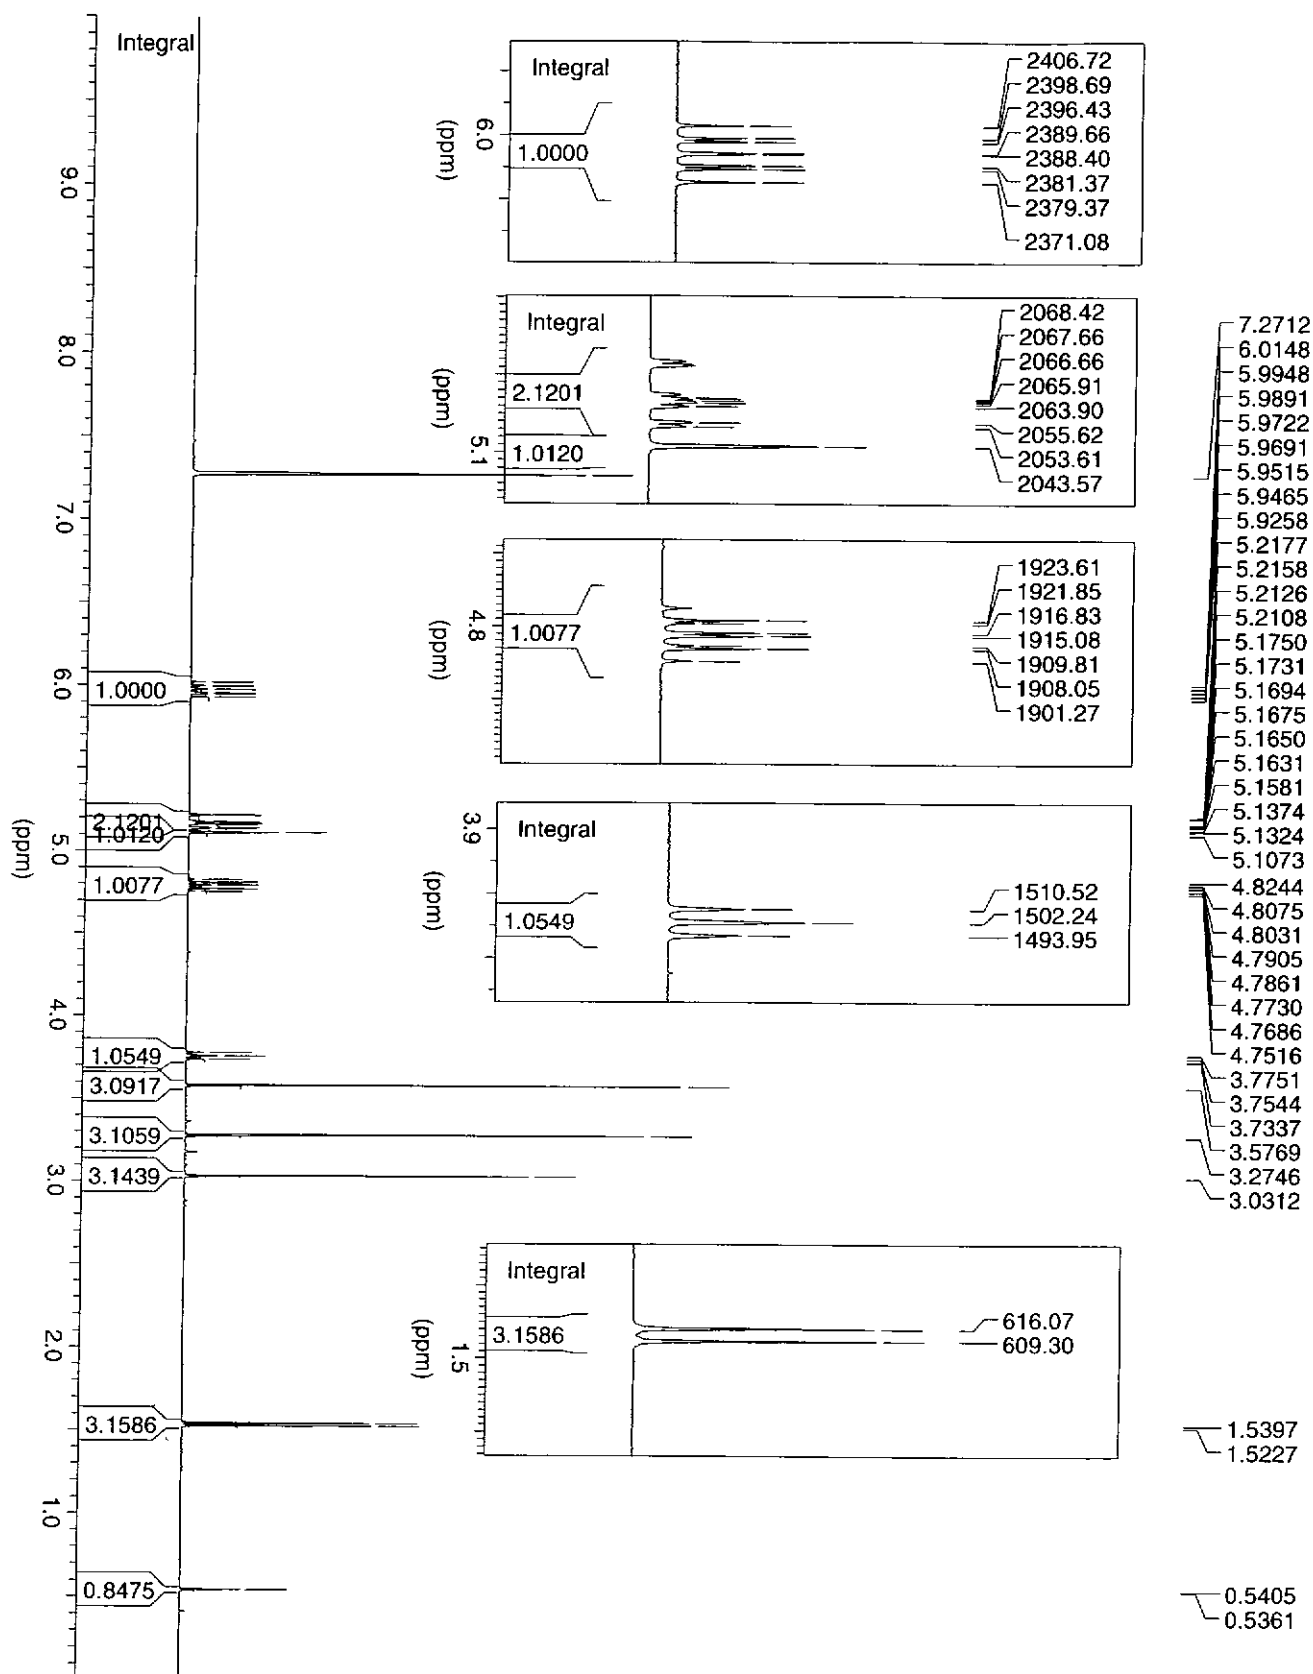

\*\*\* Current Data Parameters \*\*\*

|        |            |
|--------|------------|
| NAME   | : 20070502 |
| EXPNO  | : 210      |
| PROCNO | : 1        |

\*\*\* Acquisition Parameters \*\*\*

|         |                      |
|---------|----------------------|
| AQ_mod  | : dqt                |
| AUNM    | : au_zg              |
| BF1     | : 400.130000 MHz     |
| BF2     | : 400.130000 MHz     |
| DECSAT  | : DO                 |
| DS      | : 2                  |
| FW      | : 90000.00 Hz        |
| INSTRUM | : spect              |
| LOCNUG  | : 2H                 |
| NS      | : 16                 |
| NUCLEUS | : off                |
| O1      | : 2470.97 Hz         |
| O2      | : 2470.97 Hz         |
| PULPROG | : zg30               |
| RO      | : 20 Hz              |
| SFO1    | : 400.1324710 MHz    |
| SOLVENT | : C6D6               |
| SW      | : 20.5524 ppm        |
| SW_h    | : 8223.684 Hz        |
| TD      | : 65536              |
| TE      | : 296.7 K            |
| VD      | : 0.000000 sec       |
| YMAX_a  | : 1220843520.0000000 |
| YMIN_a  | : -928552704.0000000 |

\*\*\* Processing Parameters \*\*\*

|         |                  |
|---------|------------------|
| NC_proc | : -3             |
| OFFSET  | : 16.452 ppm     |
| SF      | : 400.130000 MHz |
| SI      | : 32768          |

\*\*\* 1D NMR Plot Parameters \*\*\*

|         |       |
|---------|-------|
| NC_proc | : -3  |
| NUCLEUS | : off |

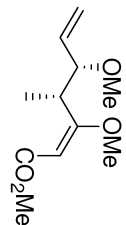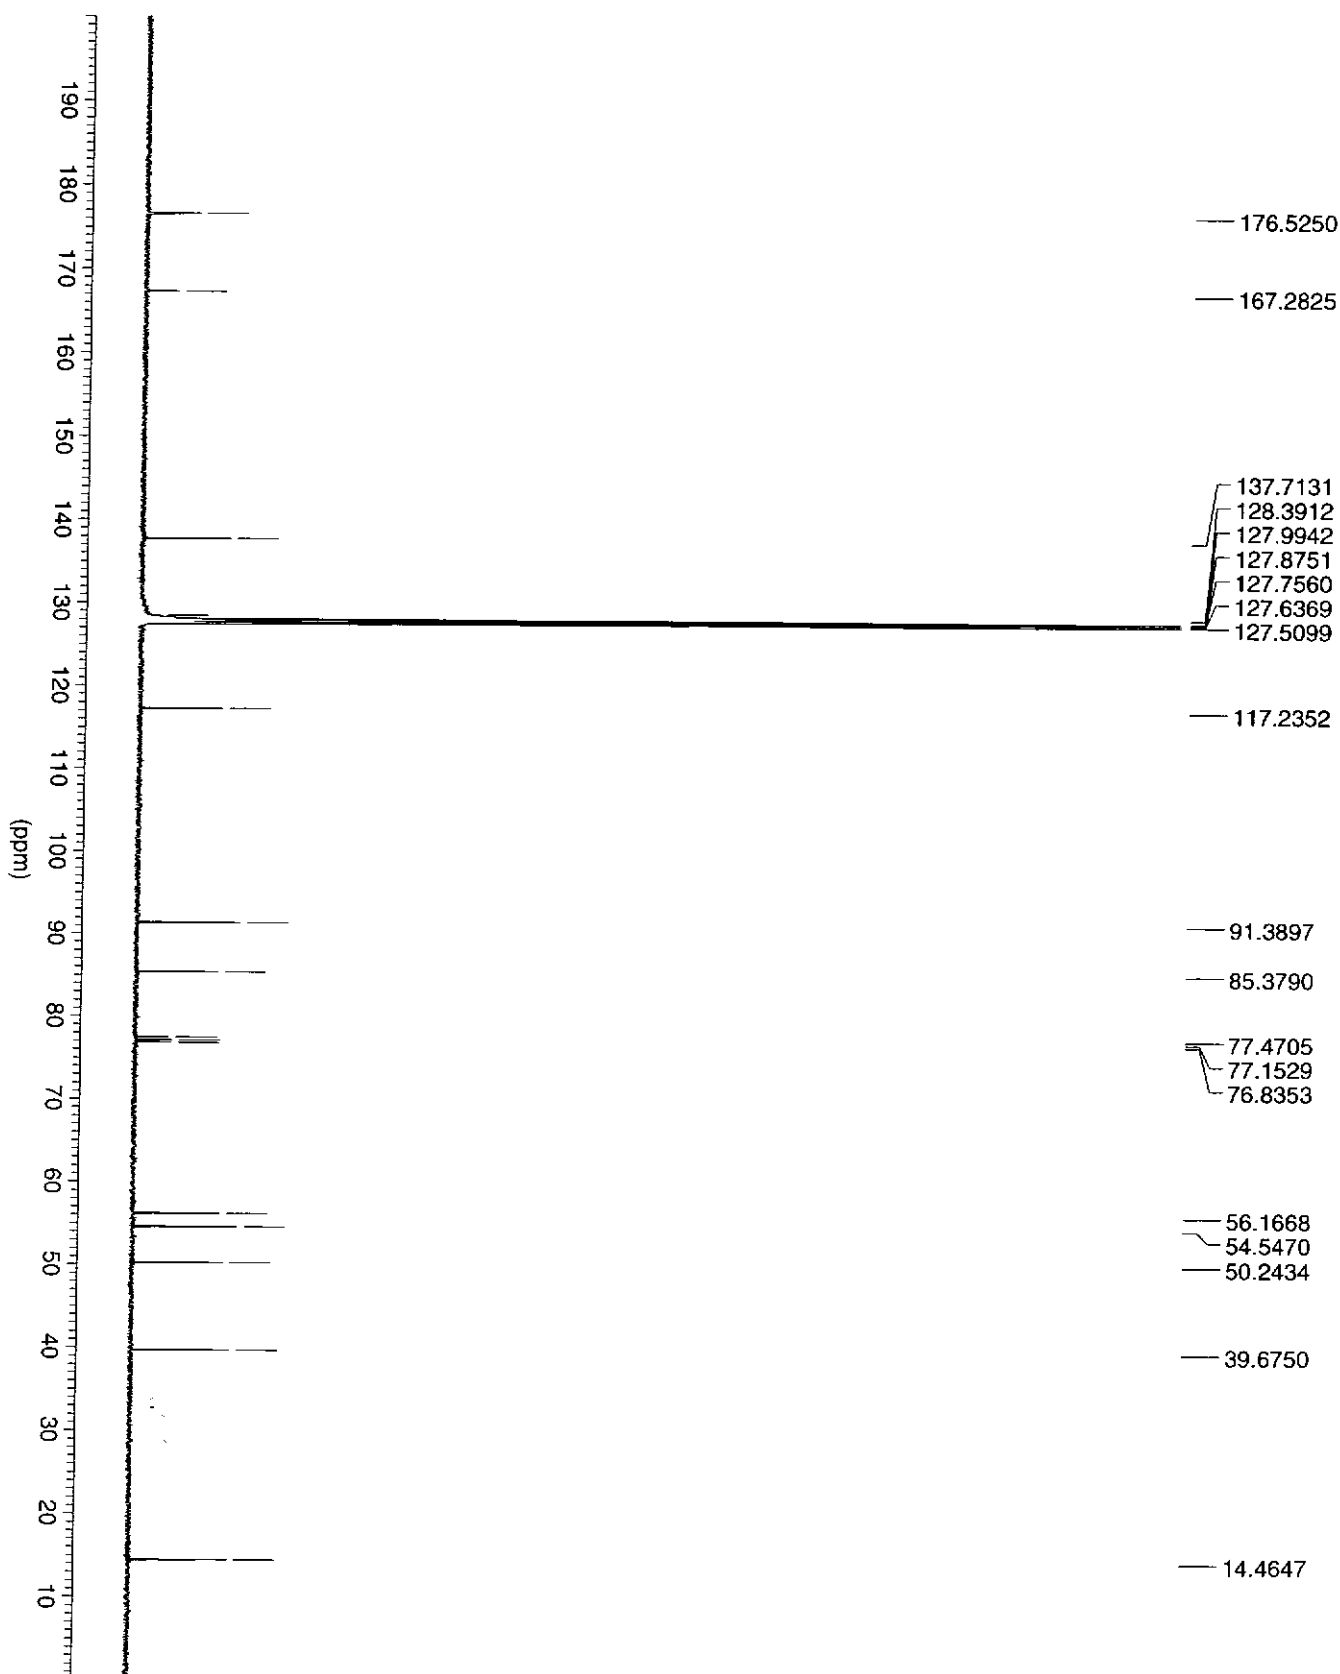

```

*** Current Data Parameters ***
NAME       : 20070503
EXPNO      : 460
PROCNO     : 1
*** Acquisition Parameters ***
AQ_mod     : qsim
AUNM       : au_zg
BF1        : 100.6127690 MHz
BF2        : 400.1300000 MHz
DECSTAT    : DO
DS         : 4
FW         : 90000.00 Hz
INSTRUM    : spect
LOCNUC     : 2H
NS         : 512
NUCLEUS    : off
O1         : 10060.17 Hz
O2         : 1600.52 Hz
PULPROG    : zgpg30
RO         : 20 Hz
SFO1       : 100.6228292 MHz
SOLVENT    : CDCl3
SW         : 260.1598 ppm
SW_h       : 26178.010 Hz
TD         : 65536
TE         : 297.5 K
VD         : 0.0000000 sec
YMAX_a     : 1250301056.0000000
YMIN_a     : -897187840.0000000
*** Processing Parameters ***
NC_proc    : 2
OFFSET     : 230.082 ppm
SF         : 100.6127690 MHz
SI         : 32768
*** 1D NMR Plot Parameters ***
NC_proc    : 2
NUCLEUS    : off
  
```

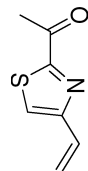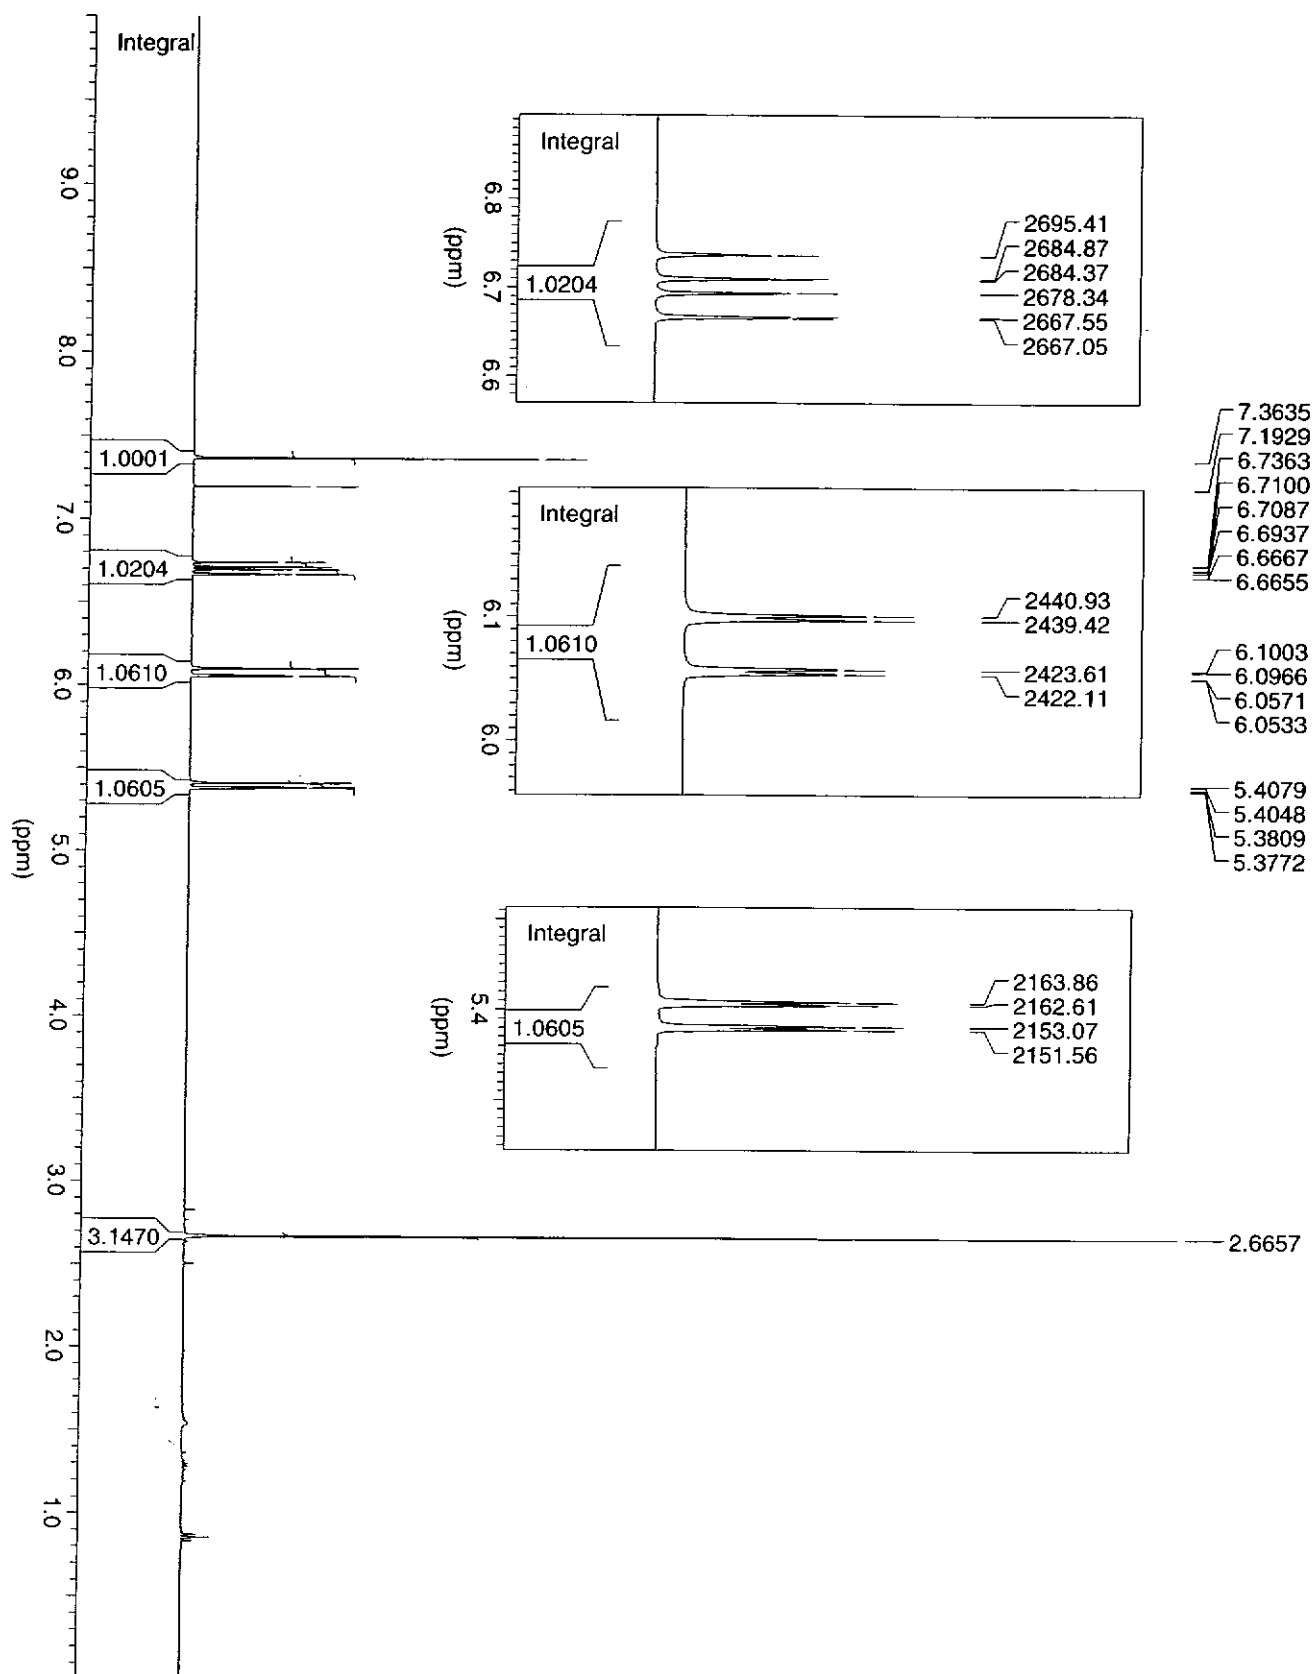

```

*** Current Data Parameters ***
NAME       : 20070320
EXPNO      : 300
PROCNO     : 1
*** Acquisition Parameters ***
AQ_mod     : dqt
AUNM       : au_zg
BF1        : 400.130000 MHz
BF2        : 400.130000 MHz
DECSTAT    : DO
DS          : 2
FW         : 90000.00 Hz
INSTRUM    : spect
LOCNUC     : 2H
NS         : 16
NUCLEUS    : off
O1         : 2470.97 Hz
O2         : 2470.97 Hz
PULPROG    : zg30
RO         : 21 Hz
SFO1       : 400.1324710 MHz
SOLVENT    : CDCl3
SW         : 20.5524 ppm
SW_h       : 8223.684 Hz
TD         : 65536
TE         : 295.9 K
VD         : 0.0000000 sec
YMAX_a     : 122088576.0000000
YMIN_a     : -929611264.0000000
*** Processing Parameters ***
NC_proc    : -1
OFFSET     : 16.361 ppm
SF         : 400.1300363 MHz
SI         : 32768
*** 1D NMR Plot Parameters ***
NC_proc    : -1
NUCLEUS    : off
  
```

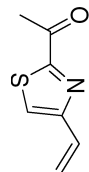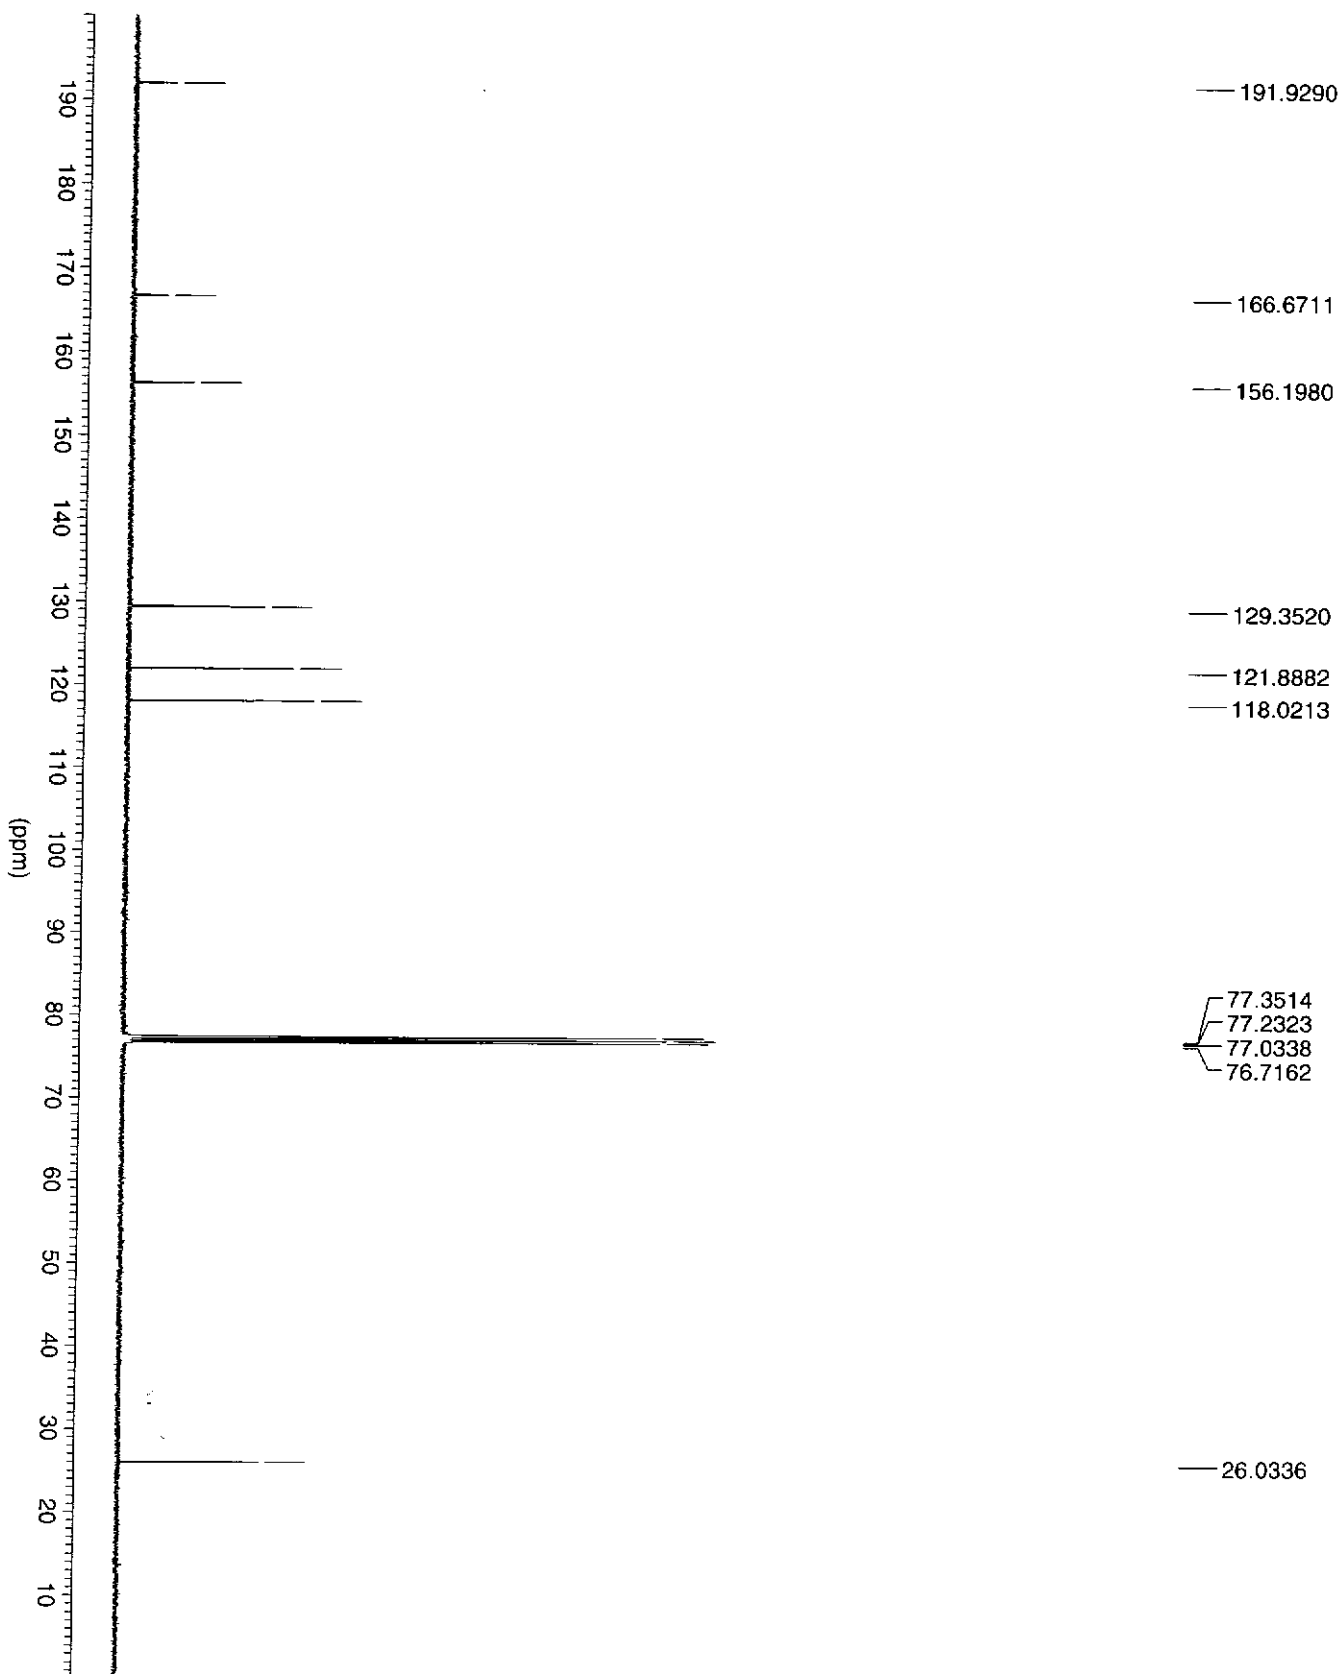

```

*** Current Data Parameters ***
NAME       : 20070321
EXPNO      : 600
PROCNO     : 1
*** Acquisition Parameters ***
AQ_mod     : qsim
AUNM       : au_zg
BF1         : 100.6127690 MHz
BF2         : 400.1300000 MHz
DECSTAT    : DO
DS          : 4
FW         : 90000.00 Hz
INSTRUM    : spect
LOCNUC     : 2H
NS         : 1000
NUCLEUS    : off
O1         : 10060.17 Hz
O2         : 1600.52 Hz
PULPROG    : zgpg30
RO         : 20 Hz
SFO1       : 100.6228292 MHz
SOLVENT    : CDCl3
SW         : 260.1598 ppm
SW_h       : 26178.010 Hz
TD         : 65536
TE         : 297.0 K
VD         : 0.0000000 sec
YMAX_a     : 1241264128.0000000
YMIN_a     : -906857088.0000000
*** Processing Parameters ***
NC_proc    : 1
OFFSET     : 230.082 ppm
SF         : 100.6127690 MHz
SI         : 32768
*** 1D NMR Plot Parameters ***
NC_proc    : 1
NUCLEUS    : off

```

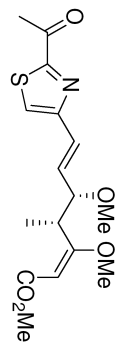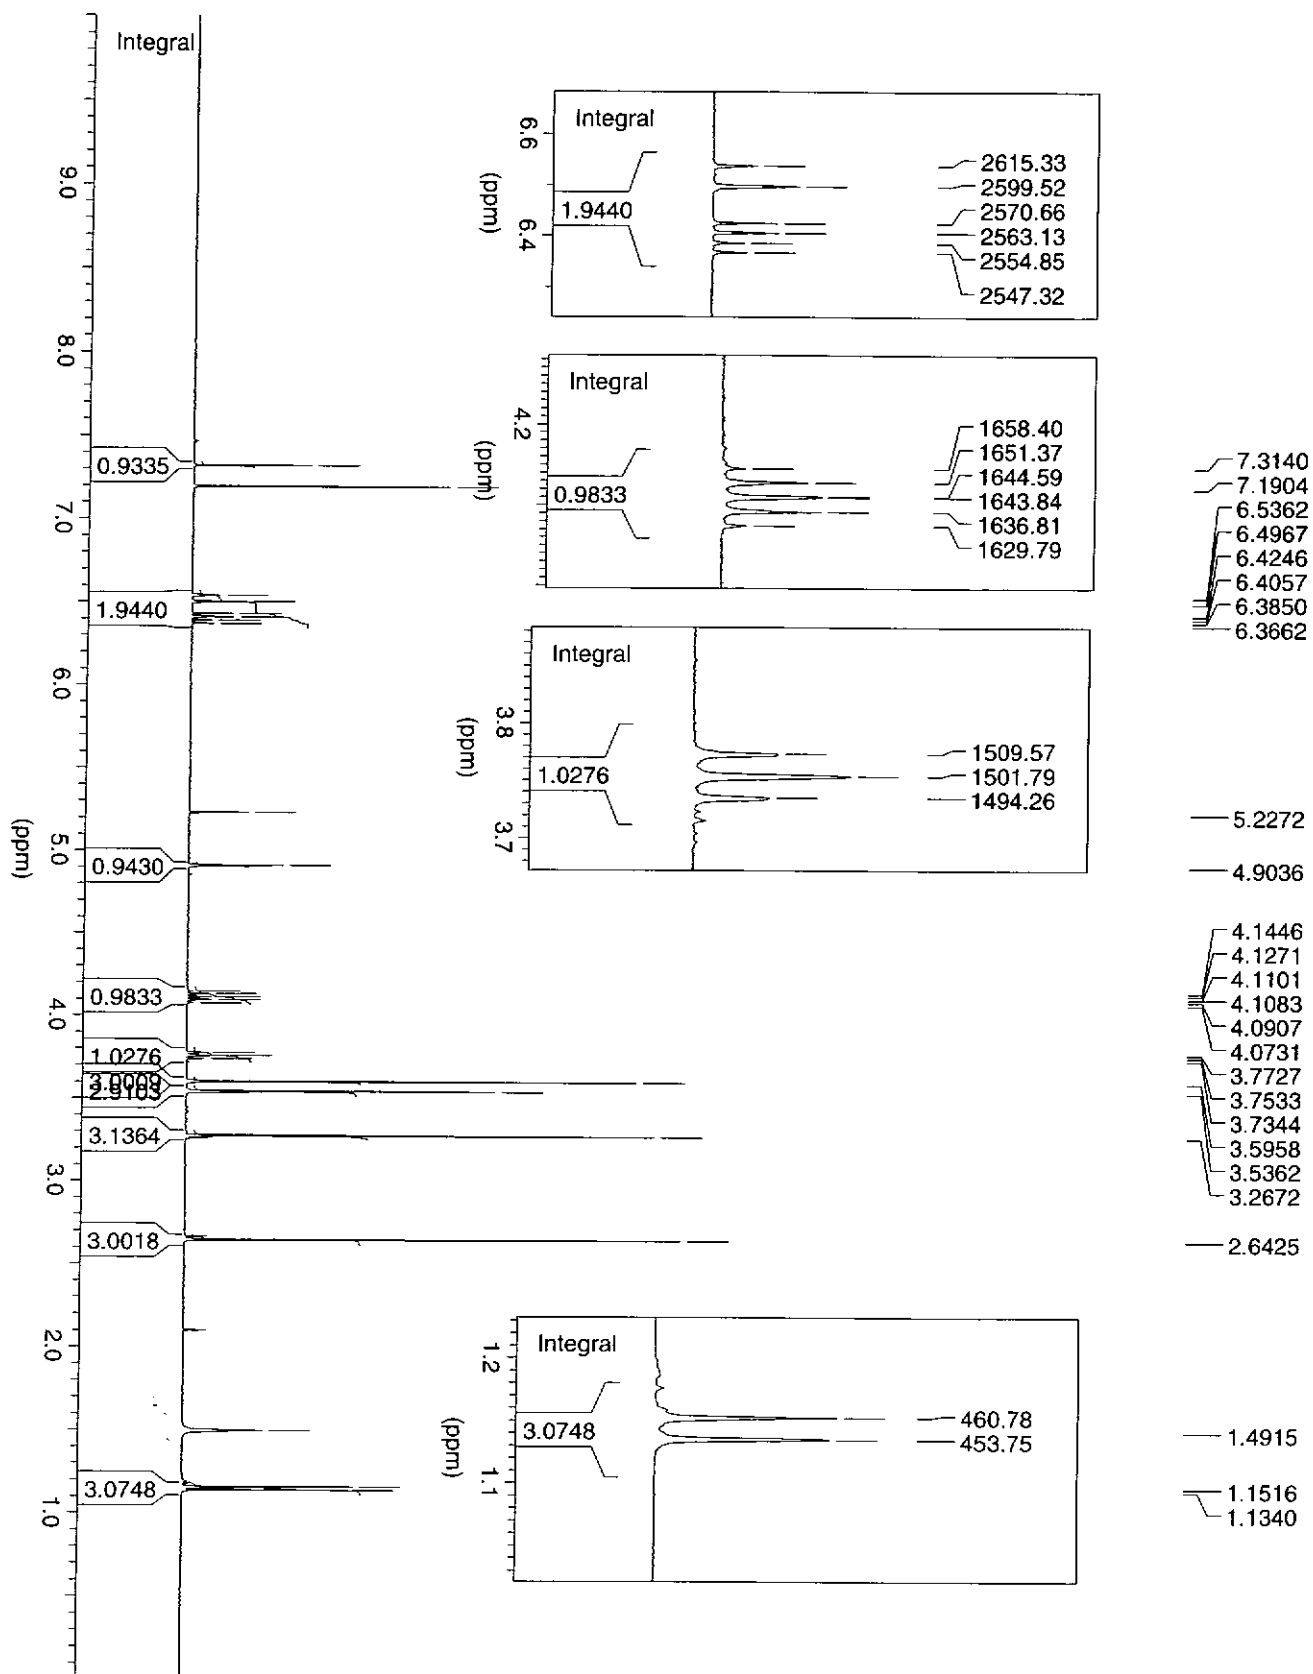

\*\*\* Current Data Parameters \*\*\*

|        |            |
|--------|------------|
| NAME   | : 20070605 |
| EXPNO  | : 120      |
| PROCNO | : 1        |

\*\*\* Acquisition Parameters \*\*\*

|         |                      |
|---------|----------------------|
| AQ_mod  | : dgd                |
| AUNM    | : au_zg              |
| BF1     | : 400.130000 MHz     |
| BF2     | : 400.130000 MHz     |
| DECTAT  | : DO                 |
| DS      | : 2                  |
| FW      | : 90000.00 Hz        |
| INSTRUM | : spect              |
| LOCNUC  | : 2H                 |
| NS      | : 16                 |
| NUCLEUS | : off                |
| O1      | : 2470.97 Hz         |
| O2      | : 2470.97 Hz         |
| PULPROG | : zg30               |
| RO      | : 20 Hz              |
| SFO1    | : 400.1324710 MHz    |
| SOLVENT | : CDCl3              |
| SW      | : 20.5524 ppm        |
| SW_h    | : 8223.684 Hz        |
| TD      | : 65536              |
| TE      | : 303.2 K            |
| VD      | : 0.000000 sec       |
| YMAX_a  | : 1217493248.0000000 |
| YMIN_a  | : -935623616.0000000 |

\*\*\* Processing Parameters \*\*\*

|         |                   |
|---------|-------------------|
| NC_proc | : -3              |
| OFFSET  | : 16.358 ppm      |
| SF      | : 400.1300376 MHz |
| SI      | : 32768           |

\*\*\* 1D NMR Plot Parameters \*\*\*

|         |       |
|---------|-------|
| NC_proc | : -3  |
| NUCLEUS | : off |

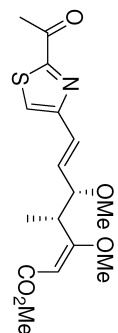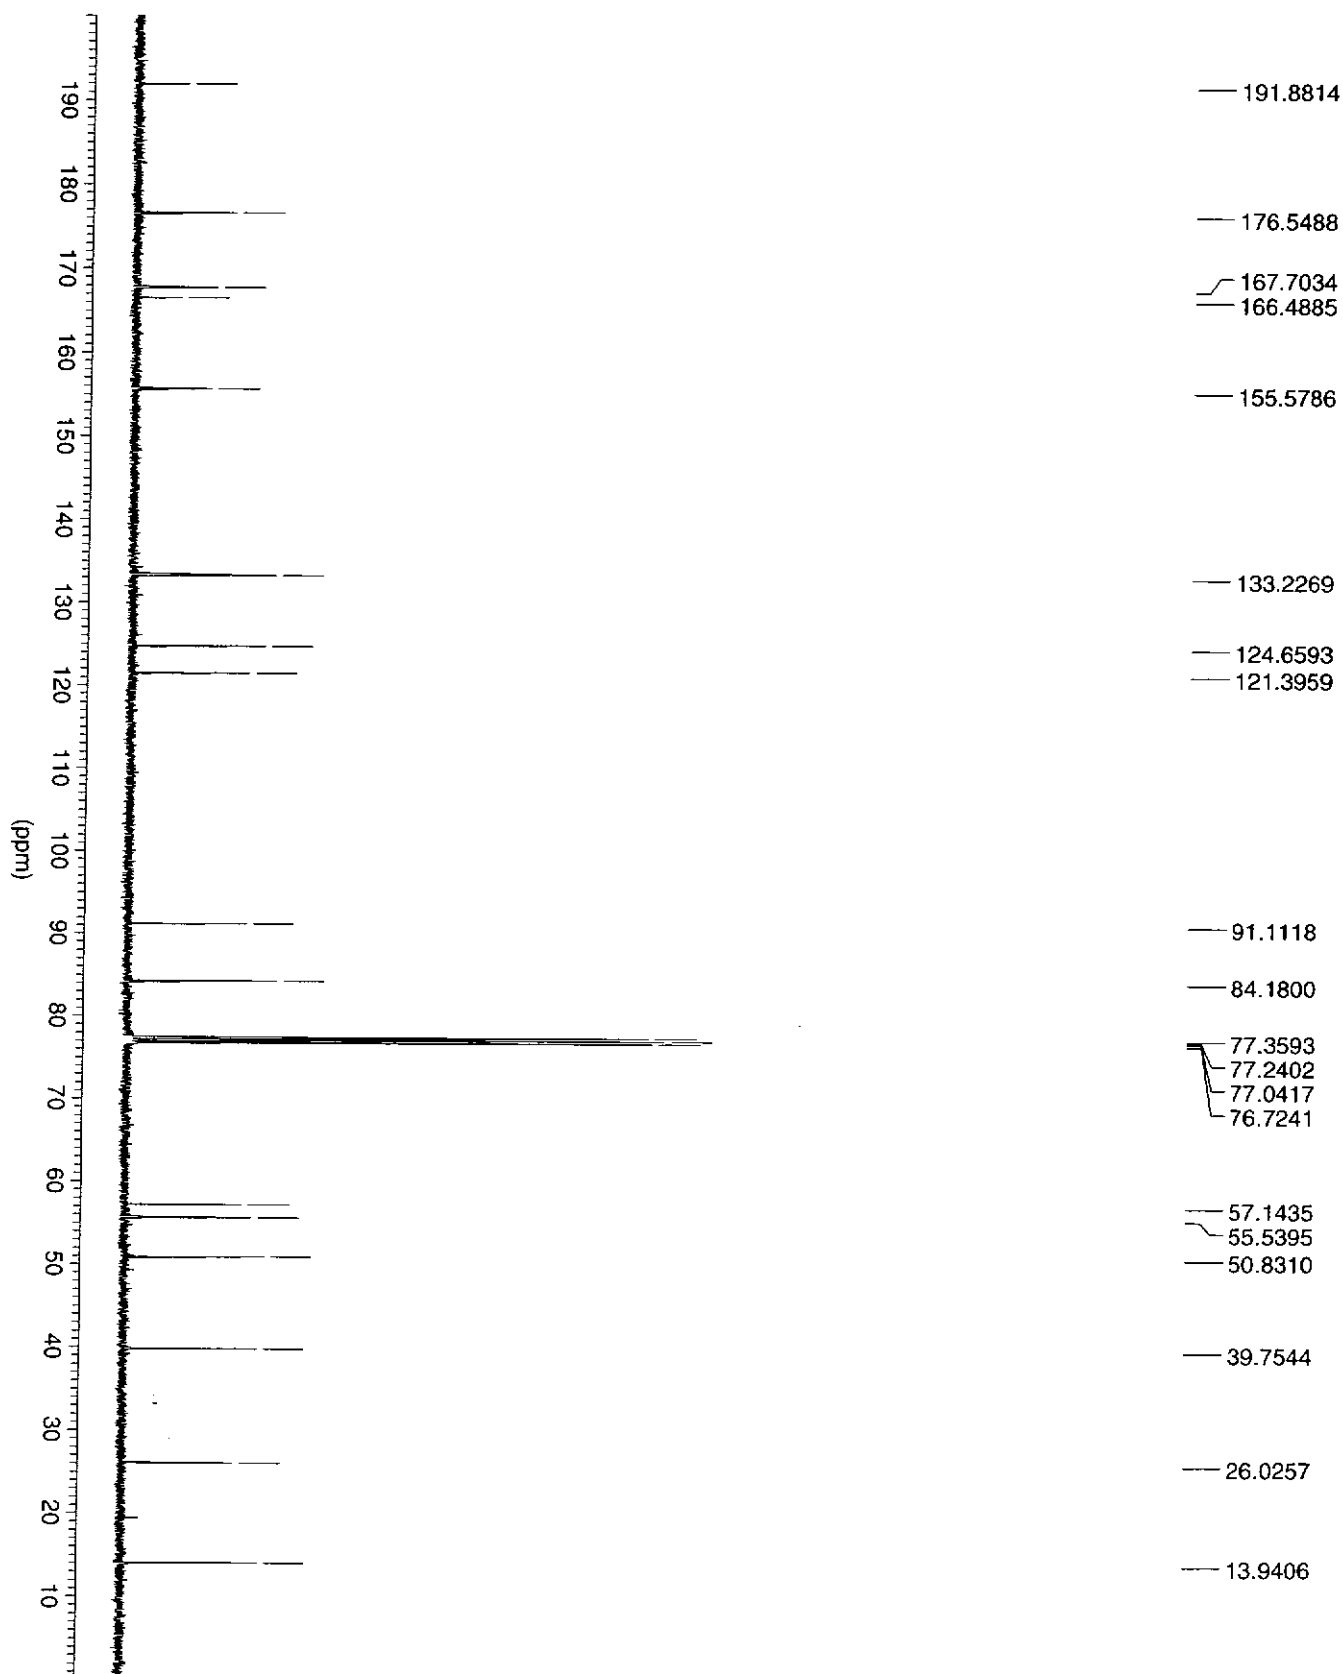

```

*** Current Data Parameters ***
NAME      : 20070410
EXPNO     : 270
PROCNO    : 1
*** Acquisition Parameters ***
AQ_mod    : qsim
AUNM      : au_zg
BF1       : 100.6127690 MHz
BF2       : 400.1300000 MHz
DECSAT    : DO
DS         : 4
FW        : 90000.00 Hz
INSTRUM   : spect
LOCNUC    : 2H
NS        : 256
NUCLEUS   : off
O1        : 10060.17 Hz
O2        : 1600.52 Hz
PULPROG   : zgpg30
RO        : 20 Hz
SFO1      : 100.6228292 MHz
SOLVENT   : CDCl3
SW        : 260.1598 ppm
SW_h      : 26178.010 Hz
TD        : 65536
TE        : 297.2 K
VD        : 0.0000000 sec
YMAX_a    : 122909776.0000000
YMIN_a    : -918446592.0000000
*** Processing Parameters ***
NC_proc   : 0
OFFSET    : 230.082 ppm
SF        : 100.6127690 MHz
SI        : 32768
*** 1D NMR Plot Parameters ***
NC_proc   : 0
NUCLEUS   : off
  
```
